# Supplementary material
Source: MDPI journal article supplement (https://www.mdpi.com/2218-0532/92/2/18)
Supplement: s1 [file s1]

## **Supplementary Materials**

### **Synthesis, Biological Evaluation, Molecular Docking and ADME Studies of Novel Pyrrole-based Schiff Bases as Dual Acting MAO/AChE Inhibitors**

#### **Table of content:**

1.  $^1\text{H}$ -NMR spectras
2.  $^{13}\text{C}$  NMR spectras
3. IR-spectroscopic spectras
4. MAS-spectras

## 1. $^1\text{H}$ -NMR spectra

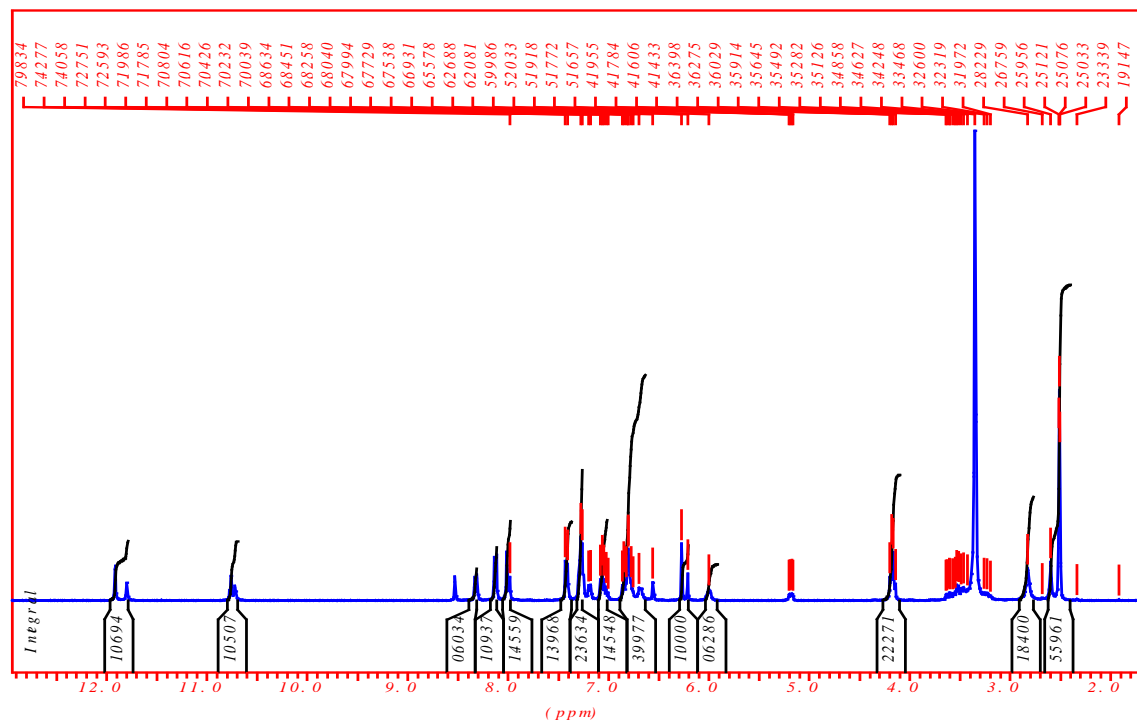

Figure S1.  $^1\text{H}$ -NMR spectra of compound 5e.

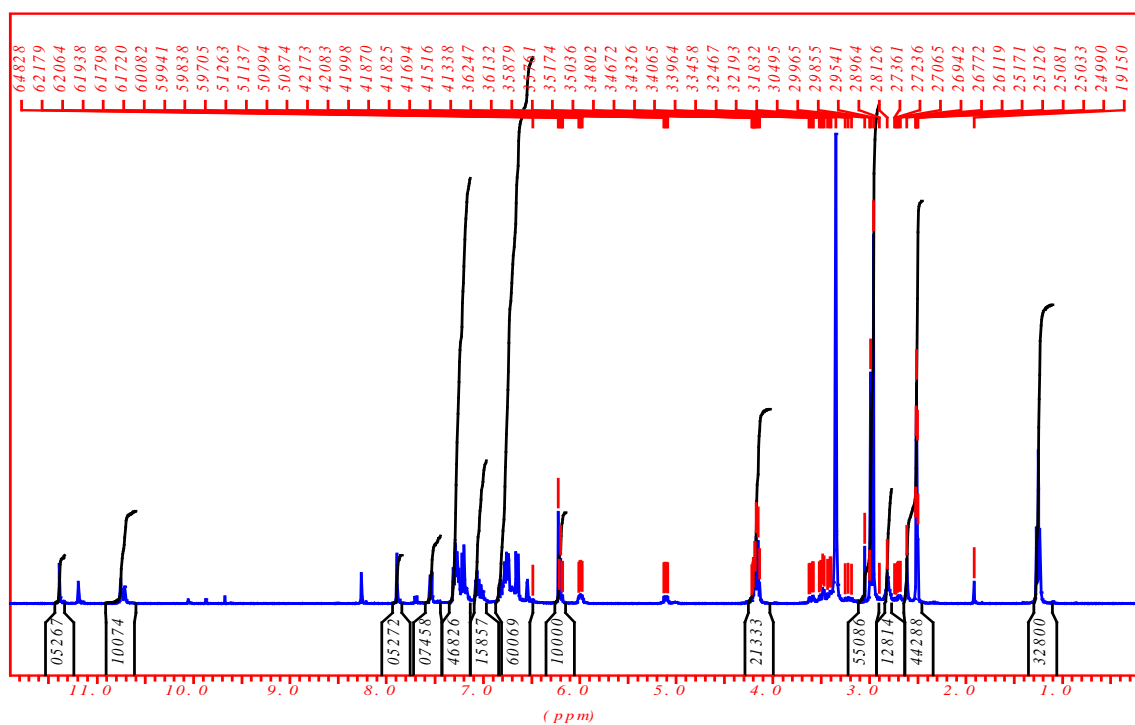

Figure S2.  $^1\text{H}$ -NMR spectra of compound 5f.

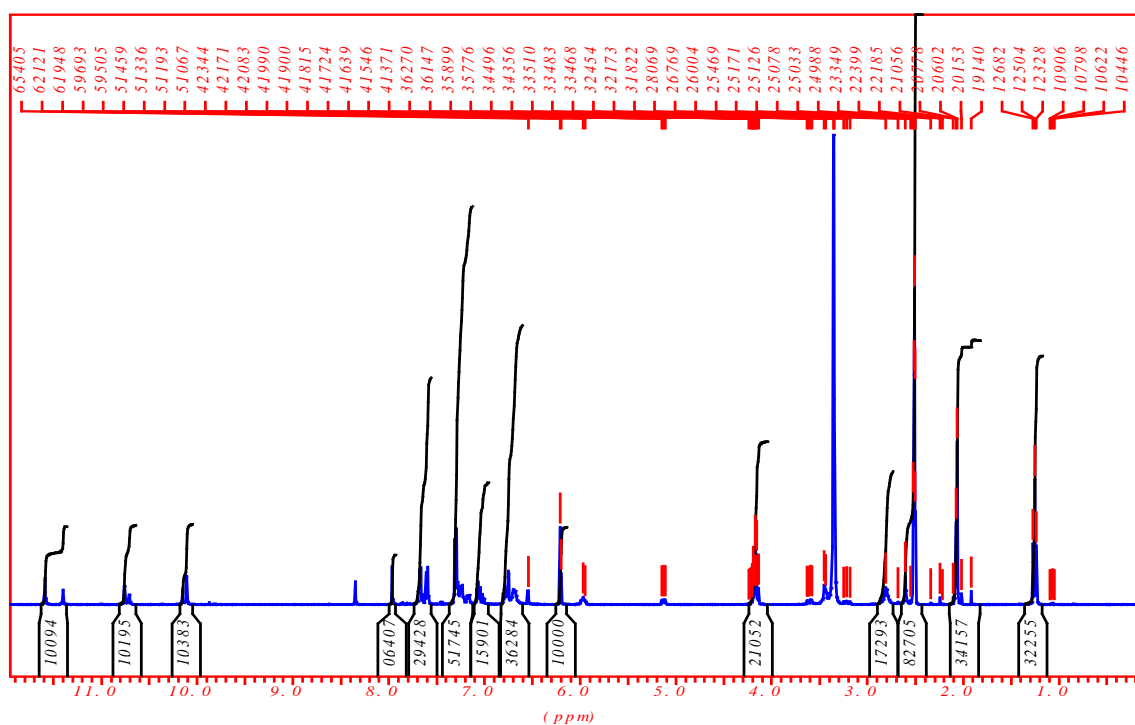

Figure S3.  $^1\text{H}$ -NMR spectra of compound 5g.

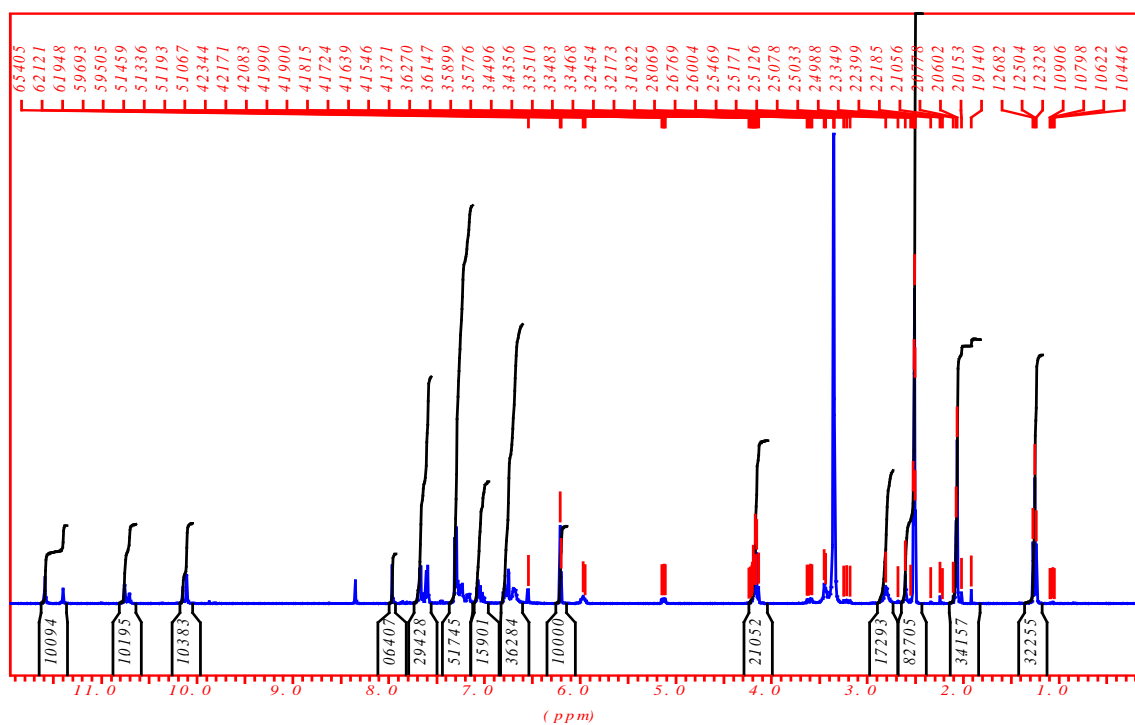

Figure S4.  $^1\text{H}$ -NMR spectra of compound 5h.

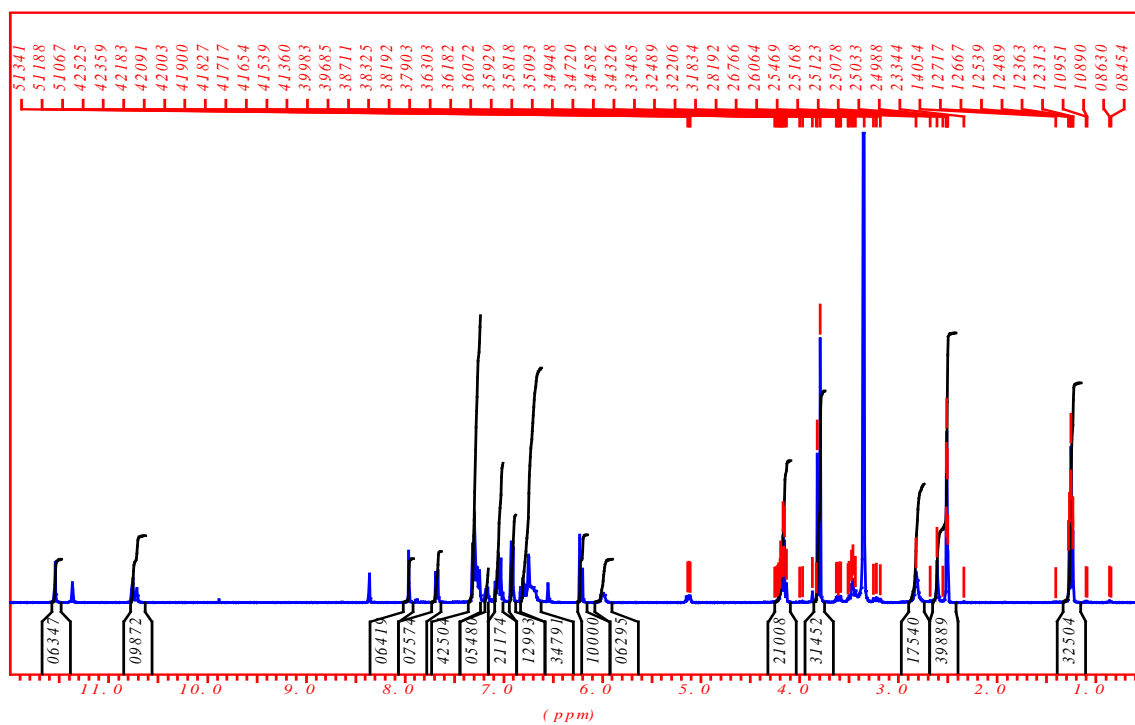

Figure S5.  $^1\text{H}$ -NMR spectra of compound 5i.

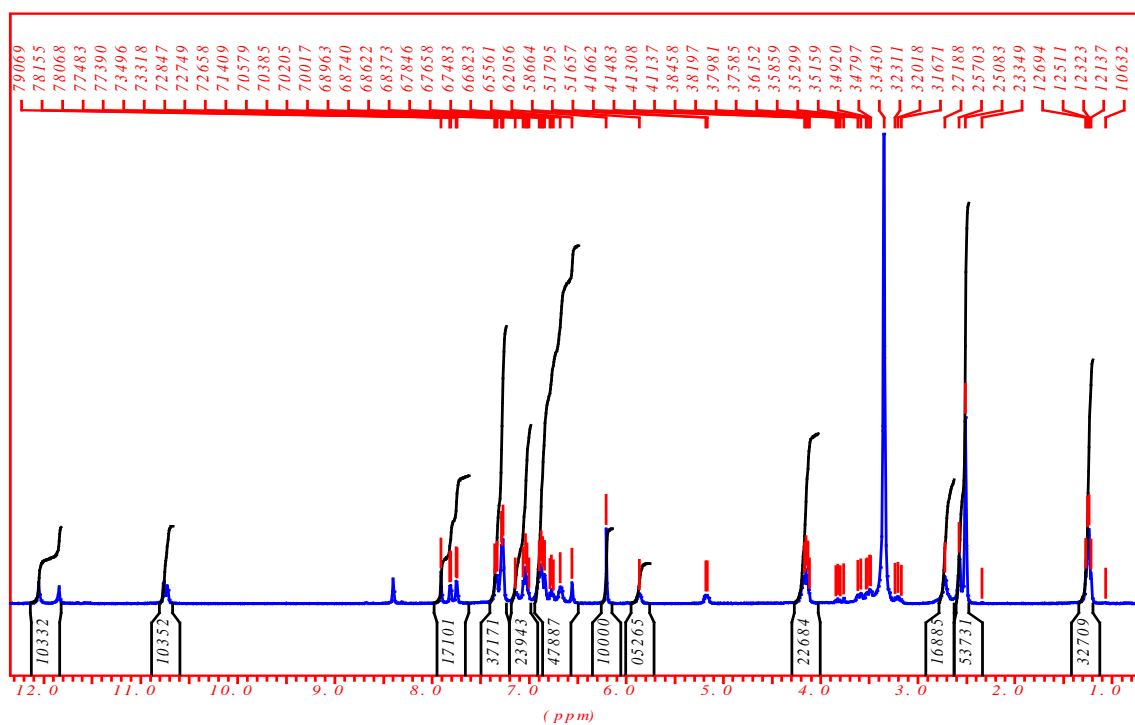

Figure S6.  $^1\text{H}$ -NMR spectra of compound 5j.

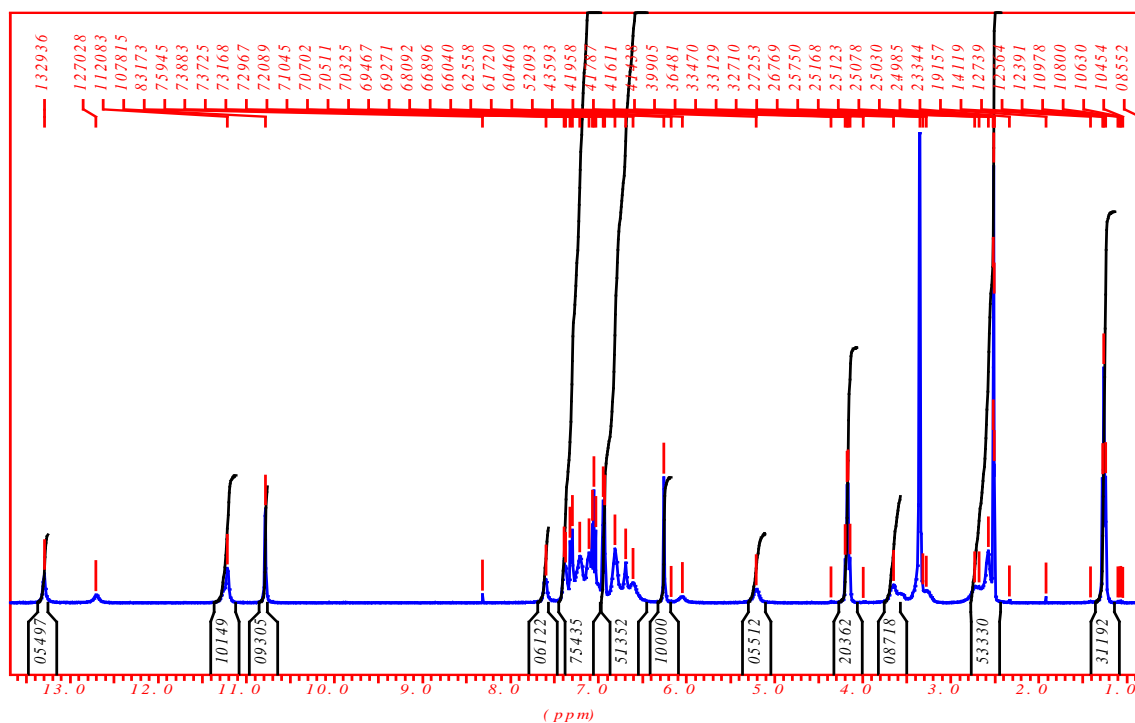

Figure S7.  $^1\text{H}$ -NMR spectra of compound 5k.

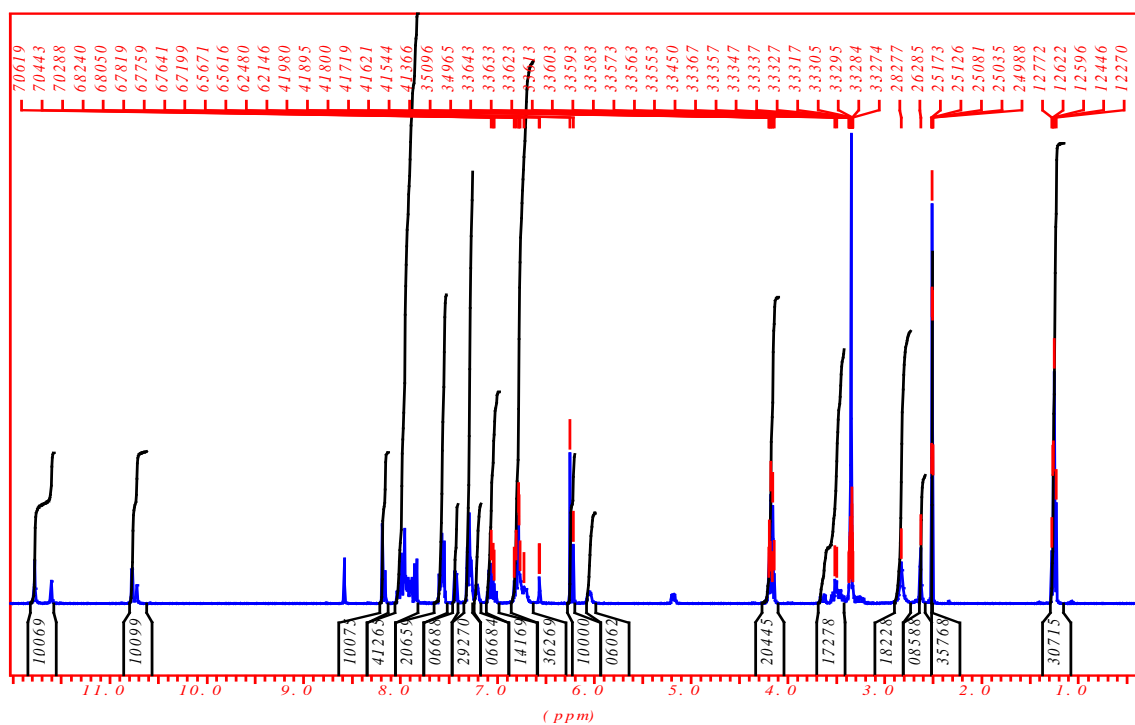

Figure S8.  $^1\text{H}$ -NMR spectra of compound 5l.

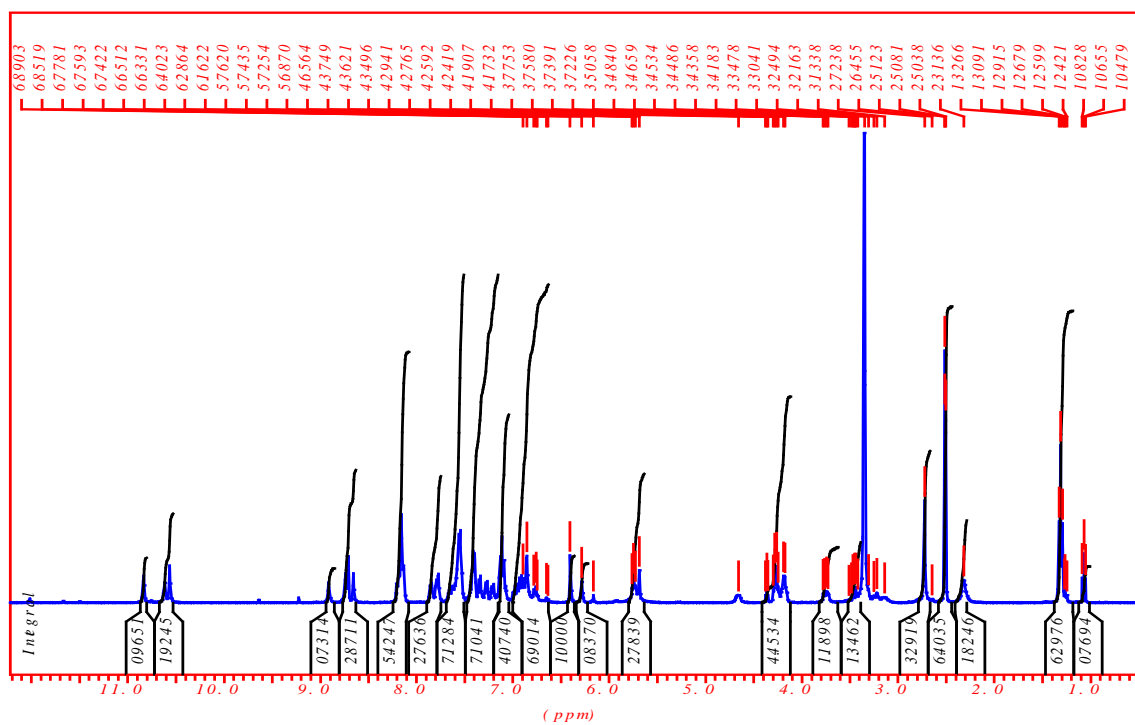

Figure S9.  $^1\text{H}$ -NMR spectra of compound 5m.



Figure S10. <sup>1</sup>H-NMR spectra of compound 5n.

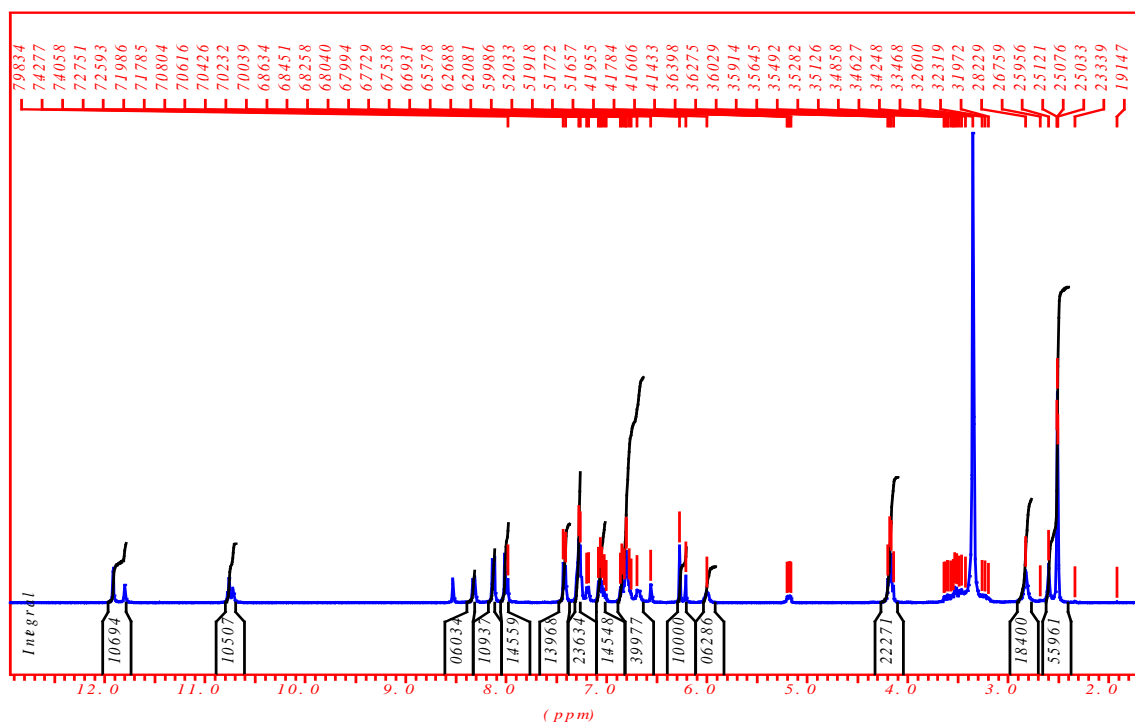

Figure S11. <sup>1</sup>H-NMR spectra of compound 5o.

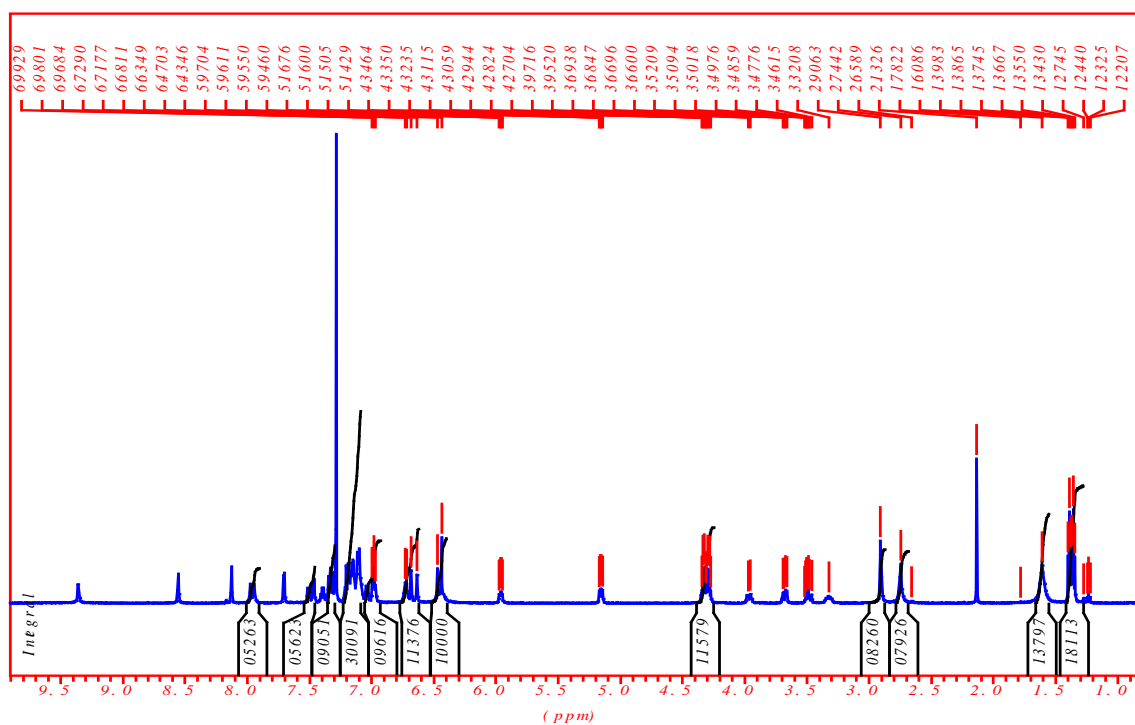

Figure S12.  $^1\text{H}$ -NMR spectra of compound 5p.

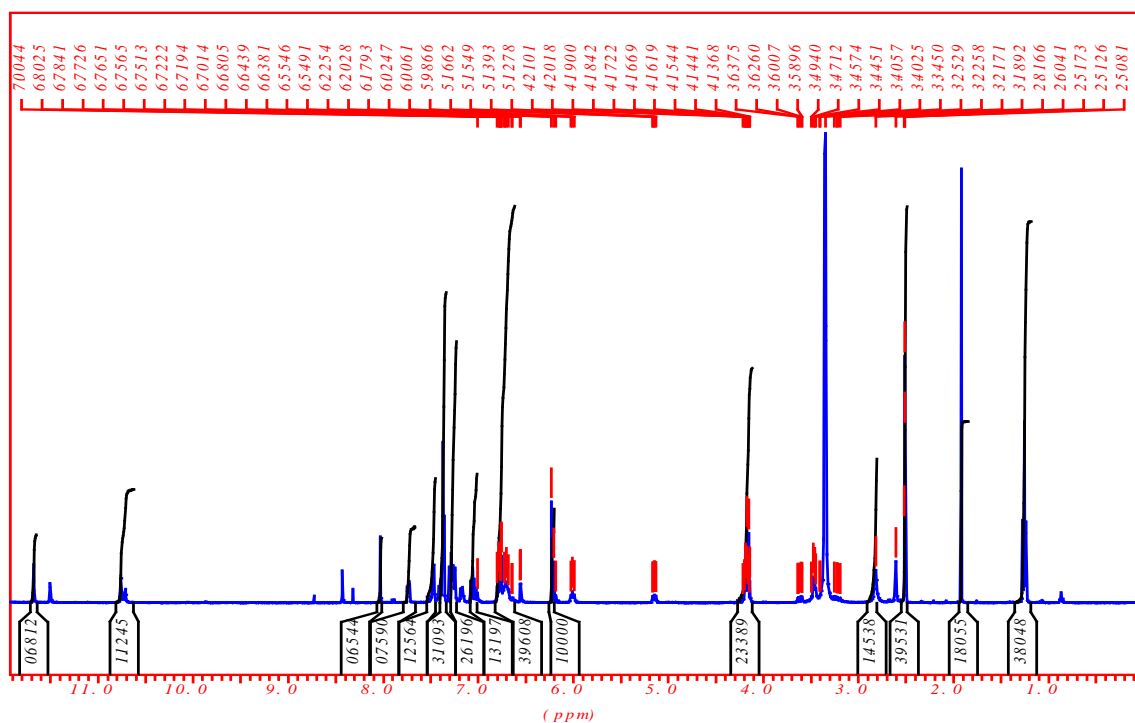

Figure S13.  $^1\text{H}$ -NMR spectra of compound 5q



## 2. $^{13}\text{C}$ NMR spectras

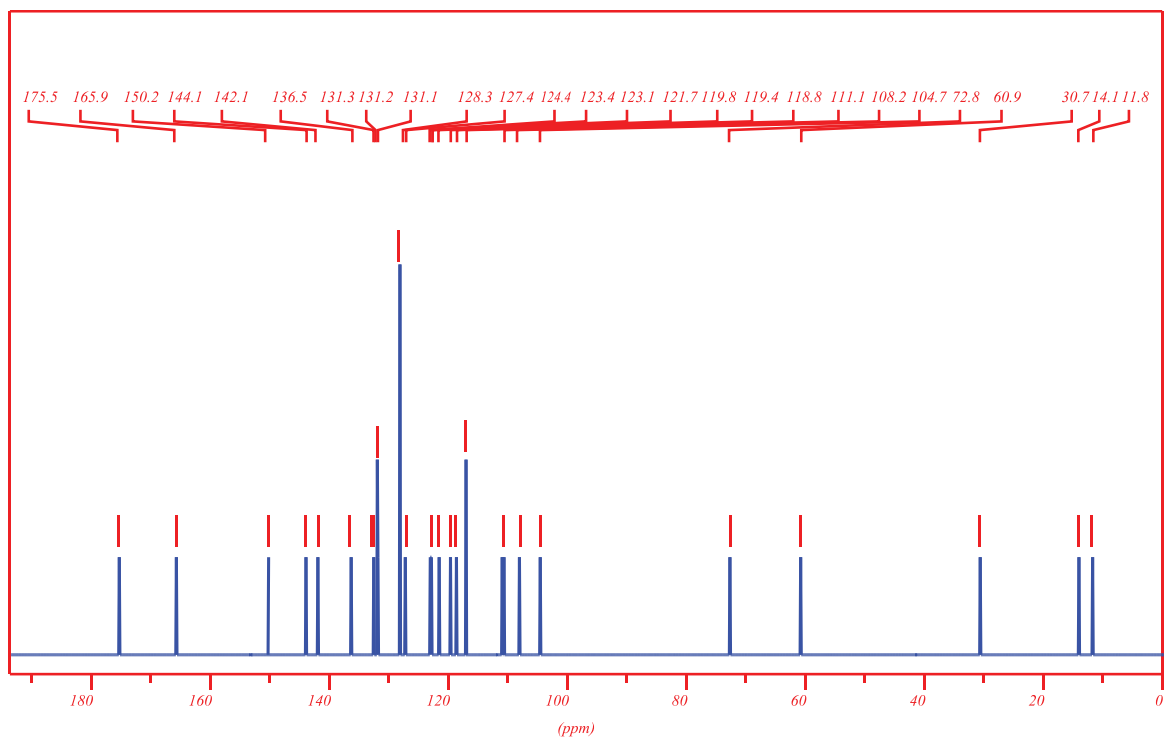

Figure S14.  $^{13}\text{C}$ -NMR spectra of compound 5e.

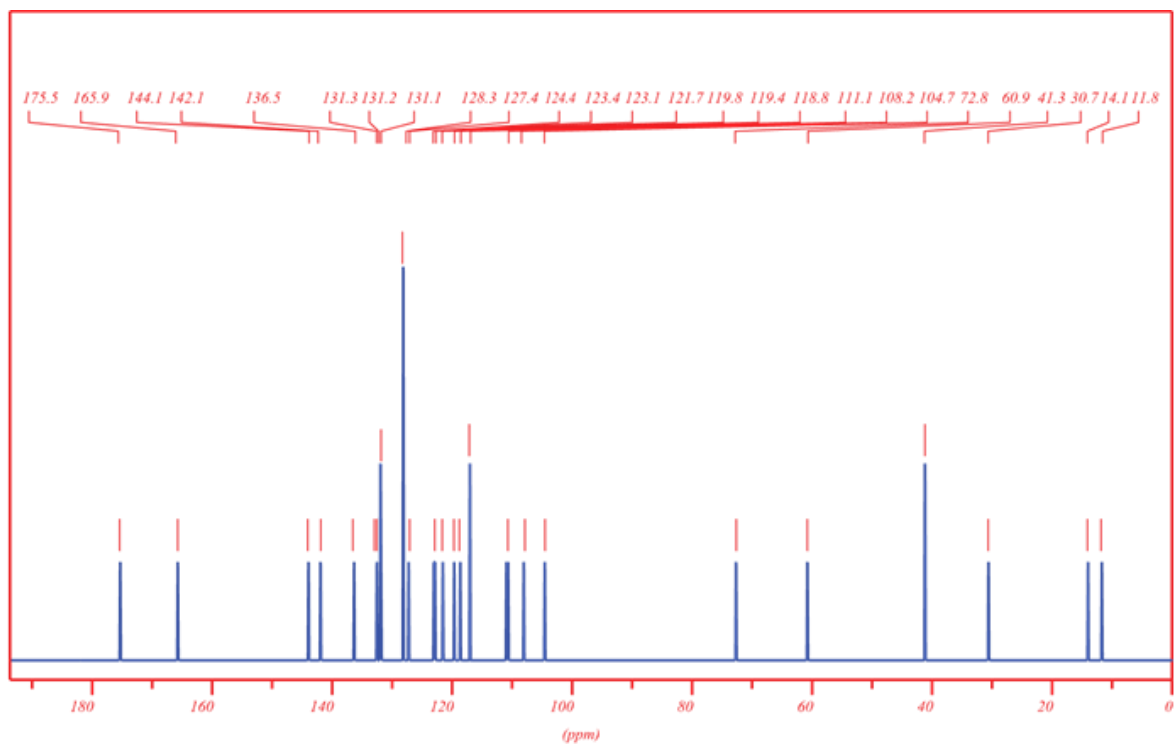

Figure S15.  $^{13}\text{C}$ -NMR spectra of compound 5f.

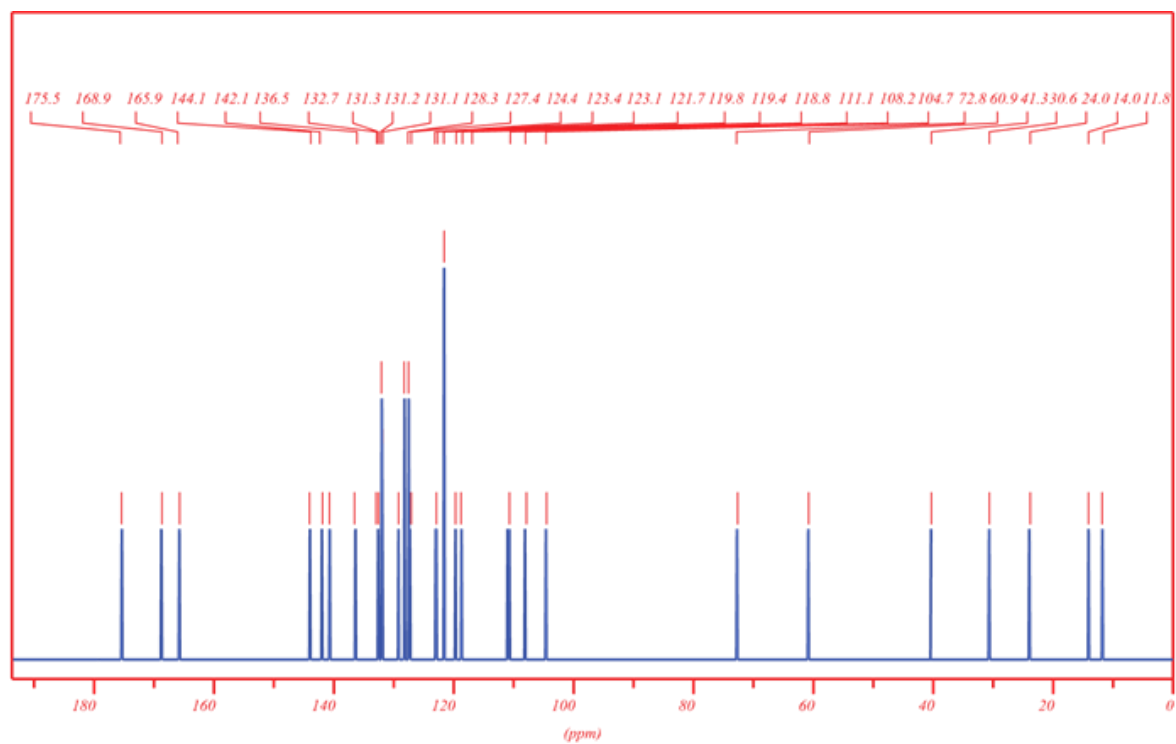

Figure S16.  $^{13}\text{C}$ -NMR spectra of compound 5g.

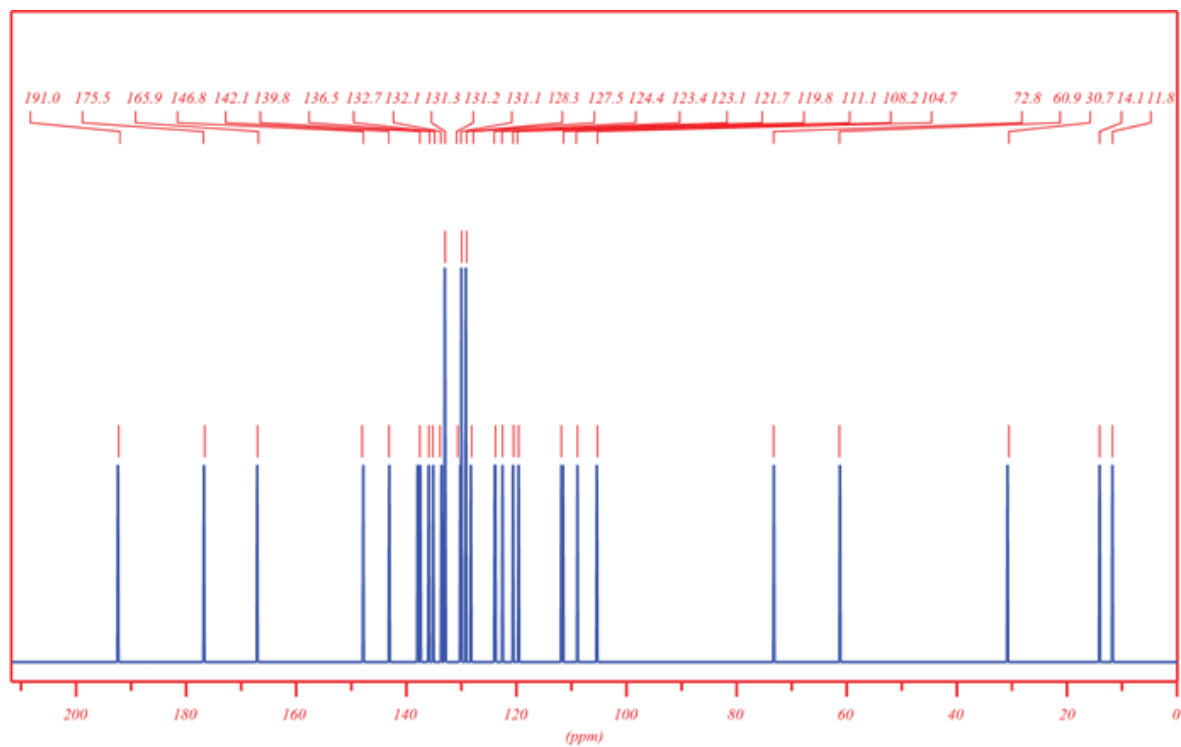

Figure S17.  $^{13}\text{C}$ -NMR spectra of compound 5h.

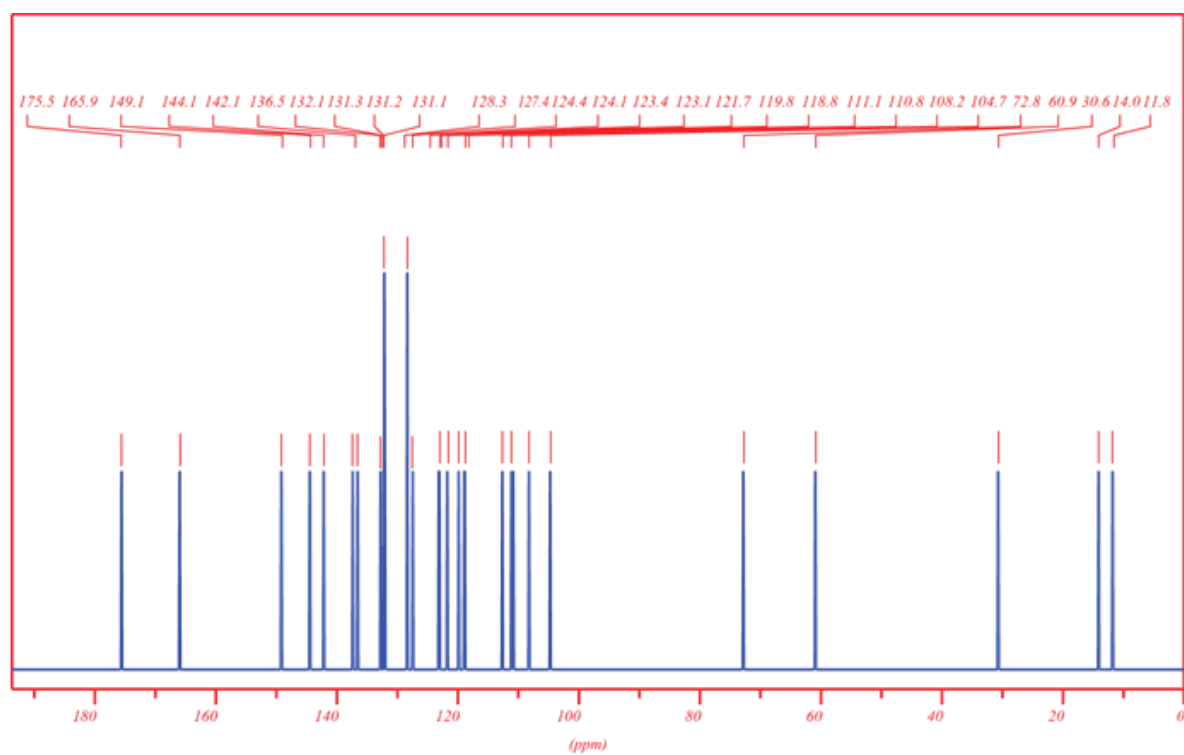

Figure S18.  $^{13}\text{C}$ -NMR spectra of compound 5i.

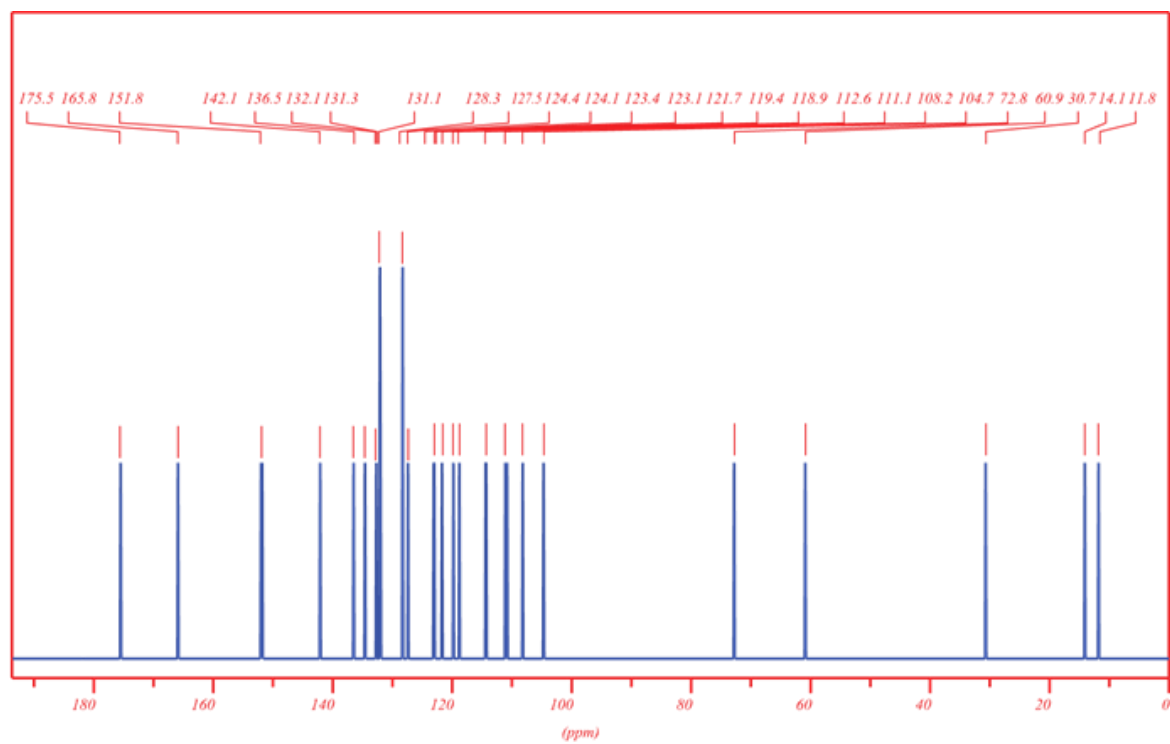

Figure S19.  $^{13}\text{C}$ -NMR spectra of compound 5j.

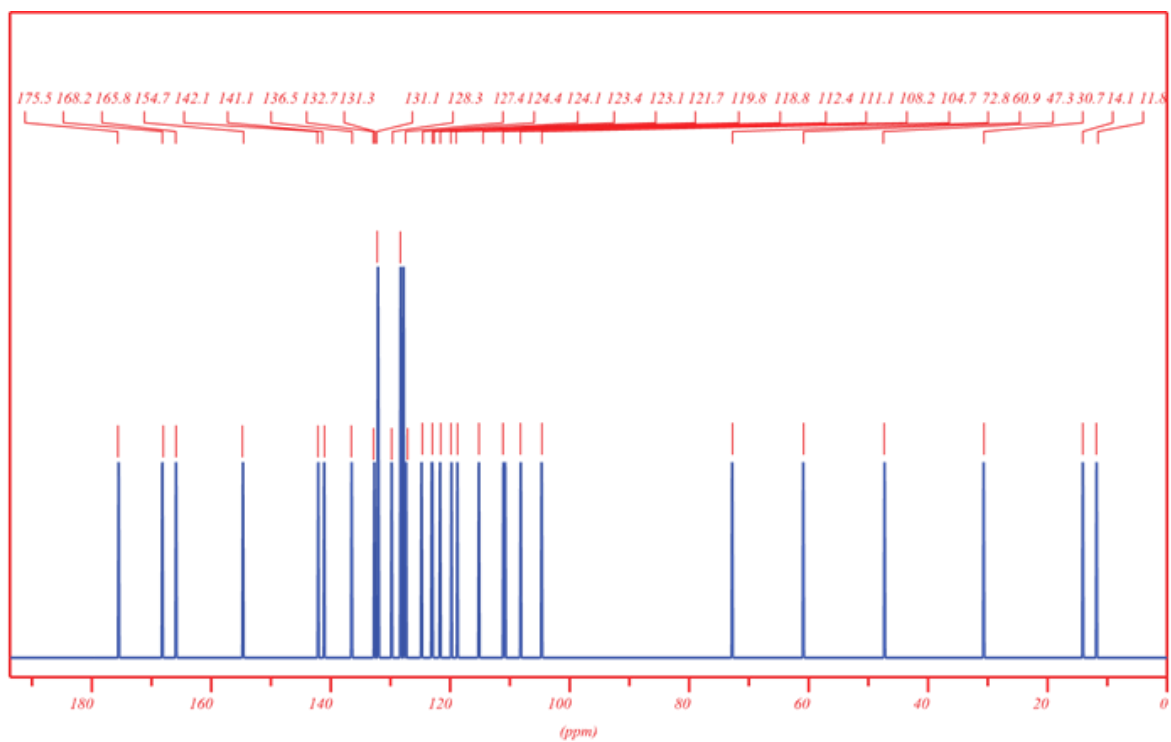

Figure S20.  $^{13}\text{C}$ -NMR spectra of compound 5k.

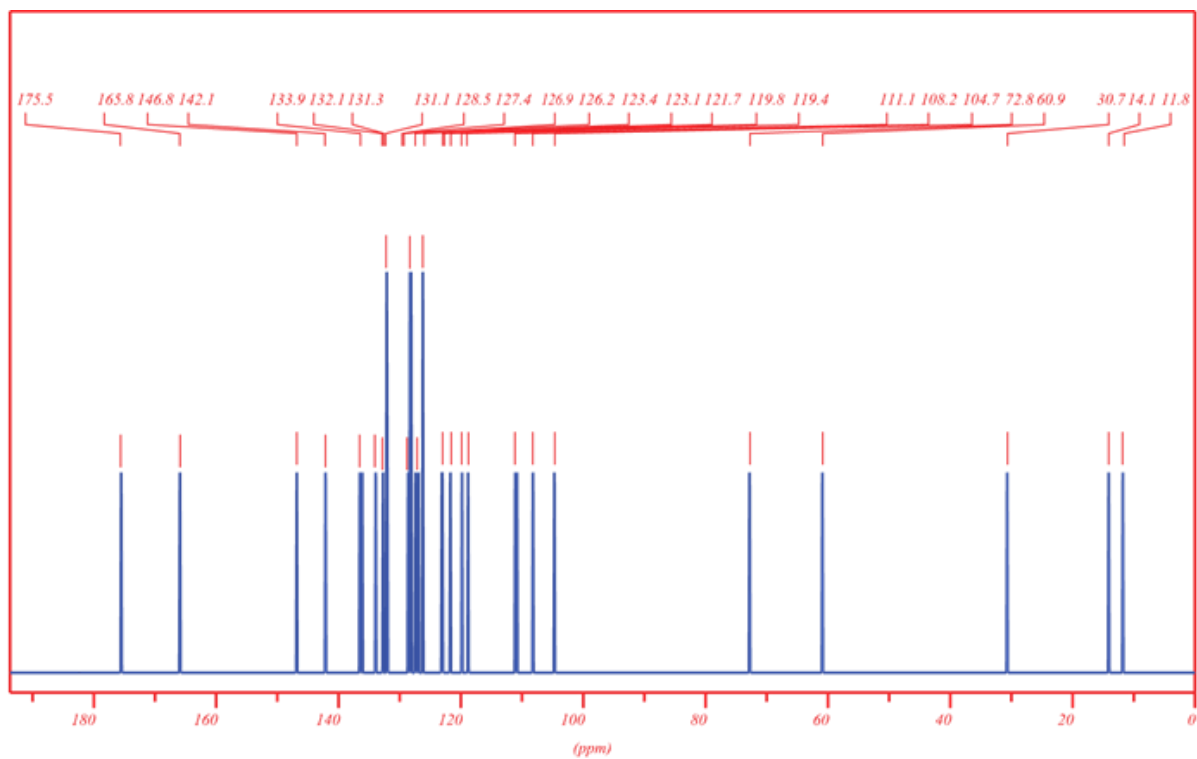

Figure S21.  $^{13}\text{C}$ -NMR spectra of compound 5l.

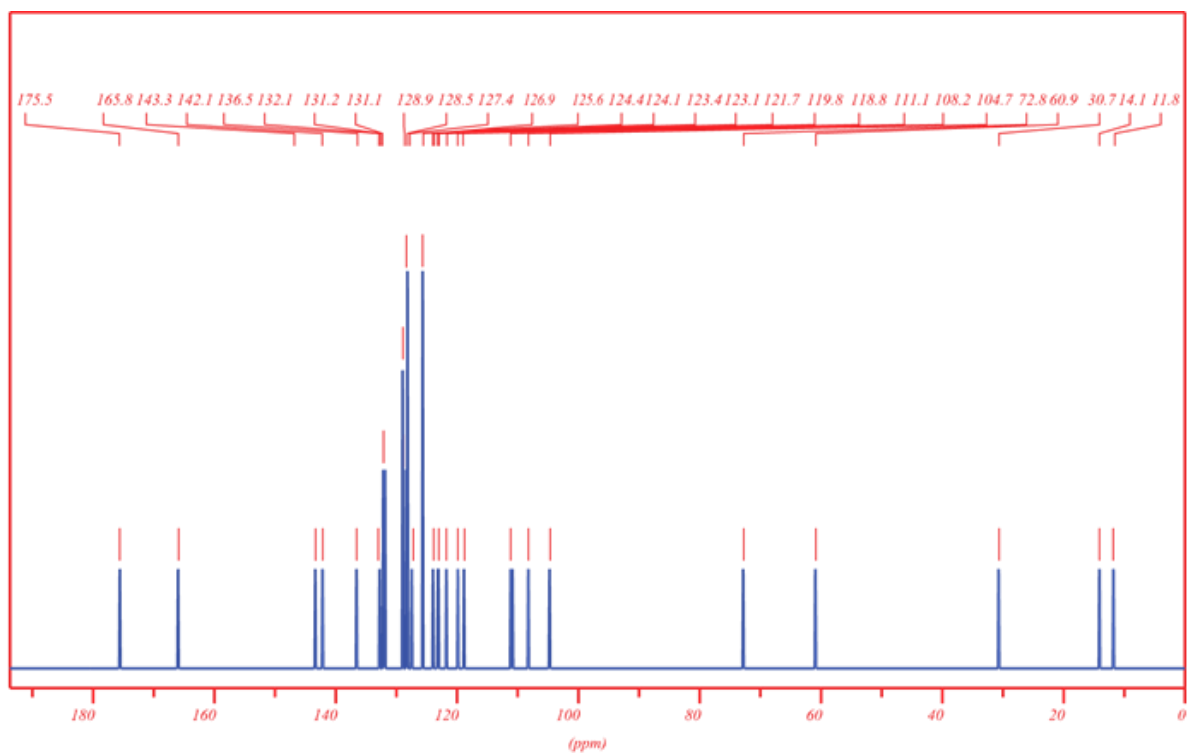

Figure S22. <sup>13</sup>C-NMR spectra of compound 5m.

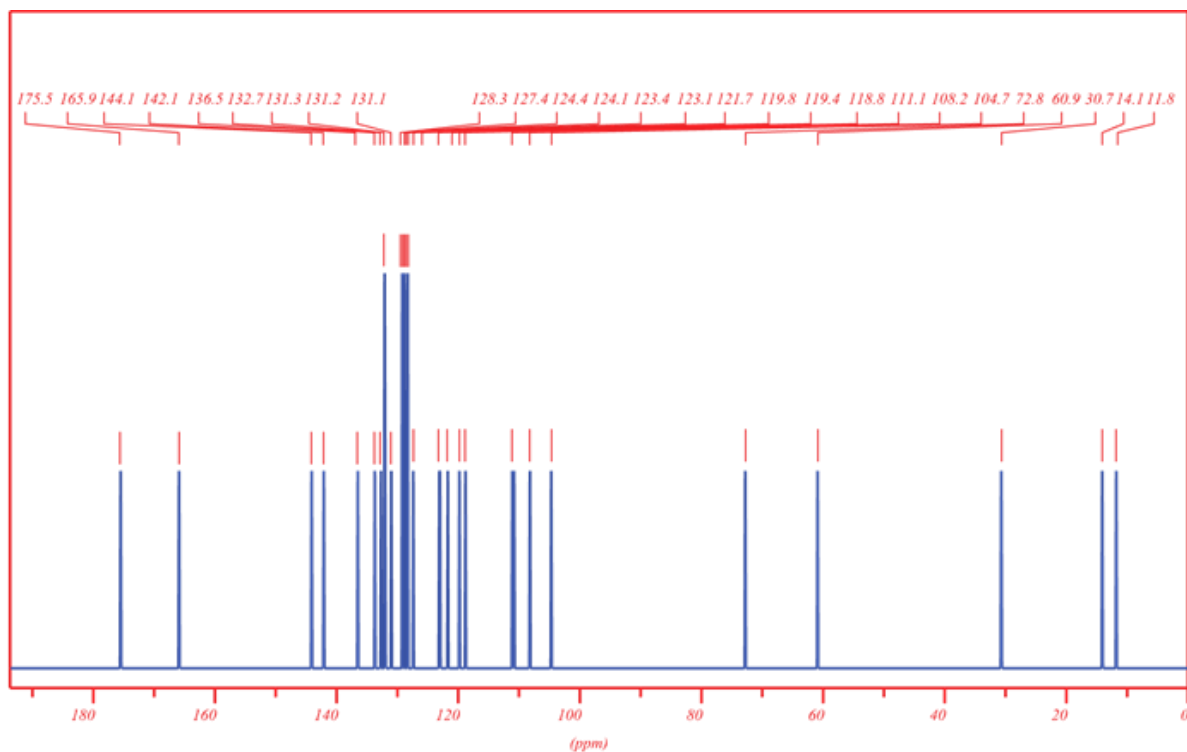

Figure S23. <sup>13</sup>C-NMR spectra of compound 5n.

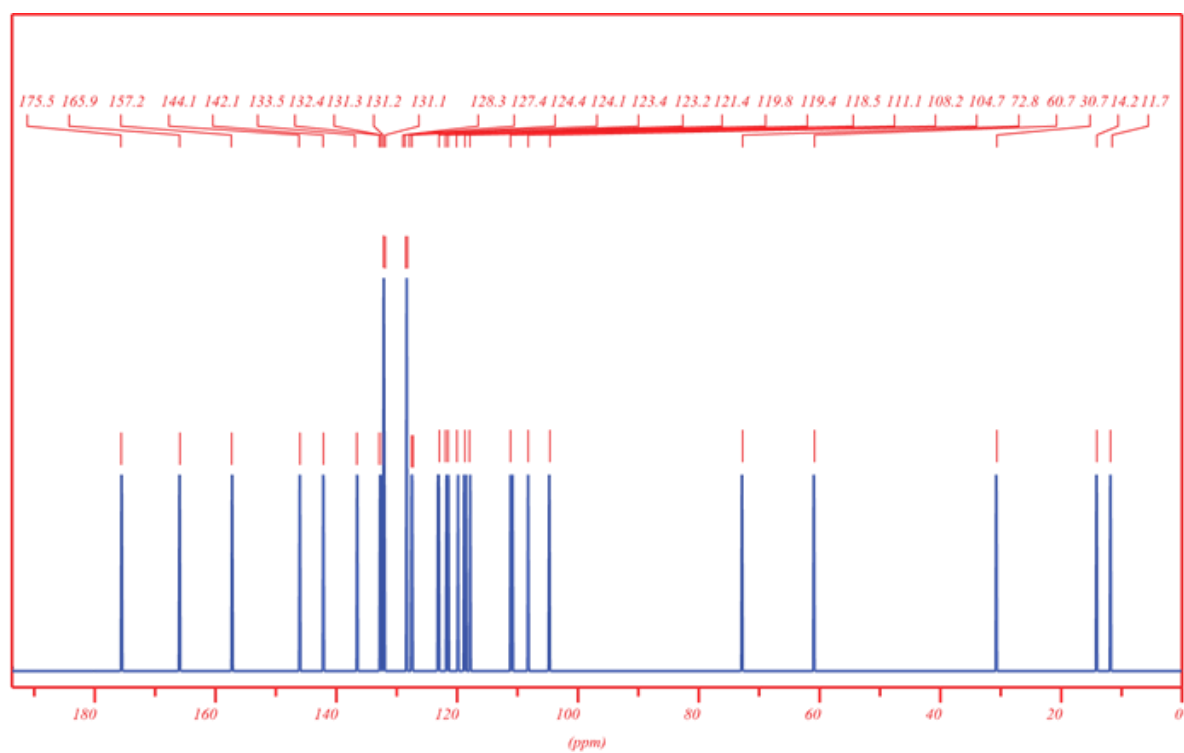

Figure S24. <sup>13</sup>C-NMR spectra of compound 5o.

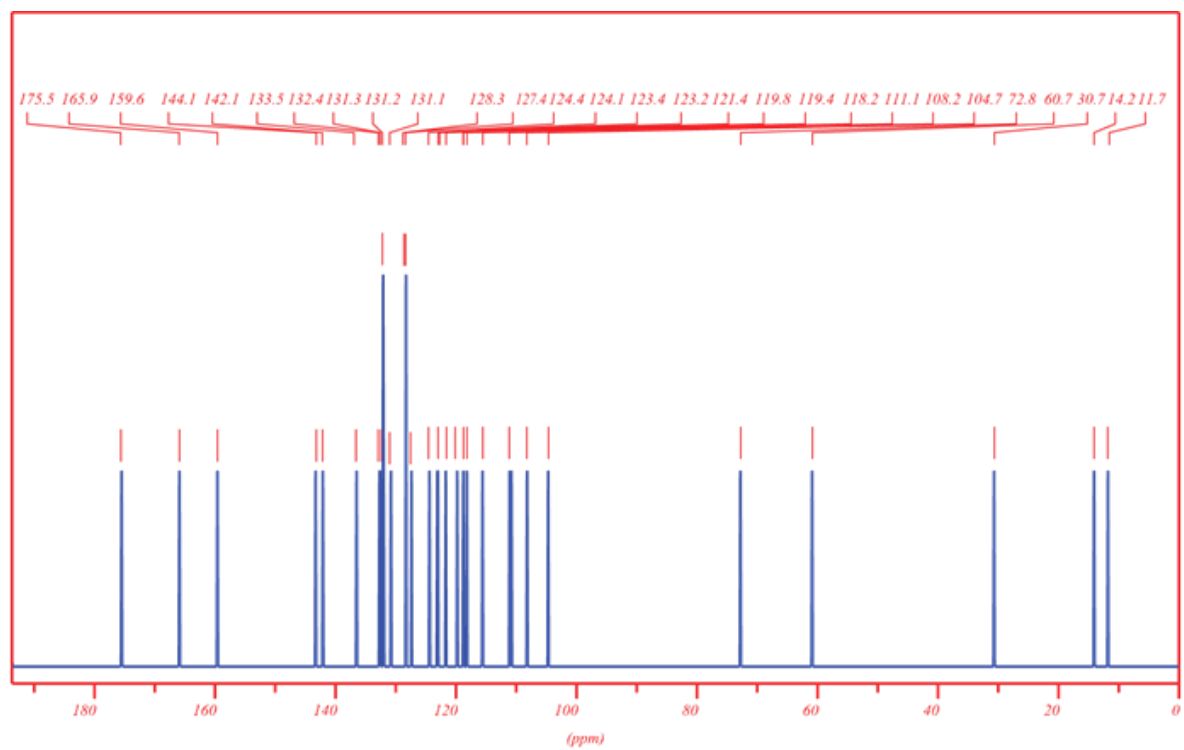

Figure S25. <sup>13</sup>C-NMR spectra of compound 5p.

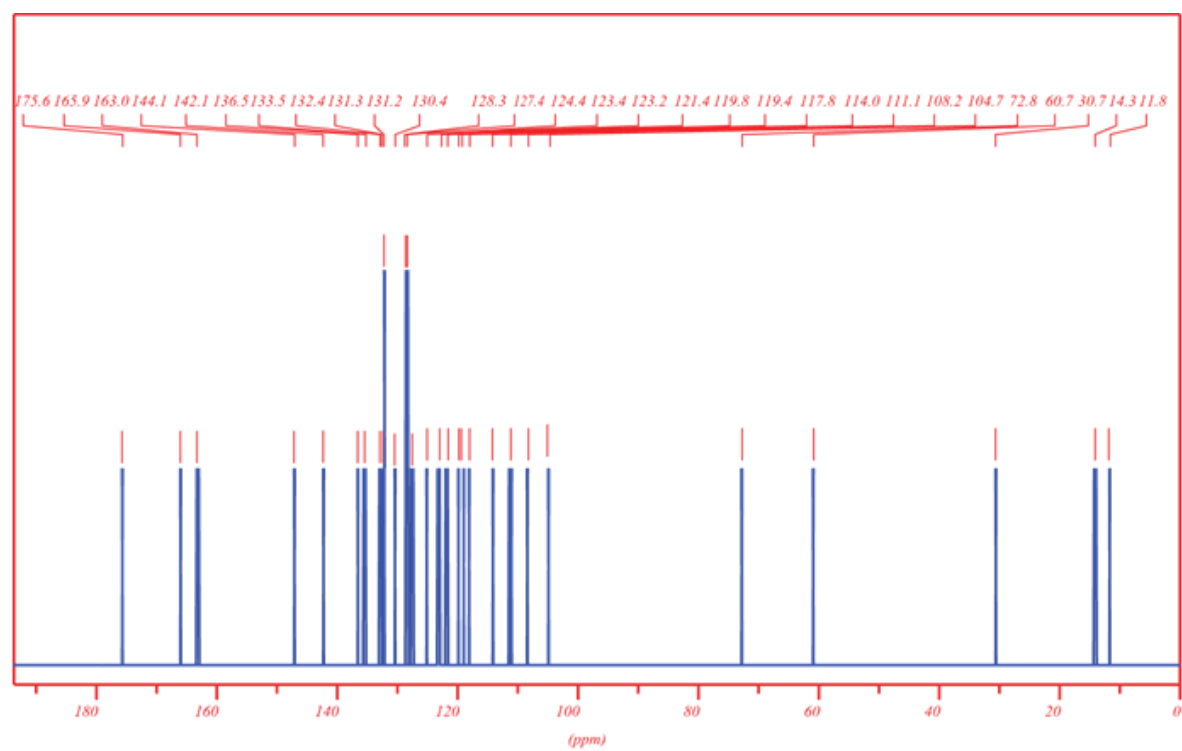

Figure S26.  $^{13}\text{C}$ -NMR spectra of compound 5q

### 3. IR-spectroscopic spectra

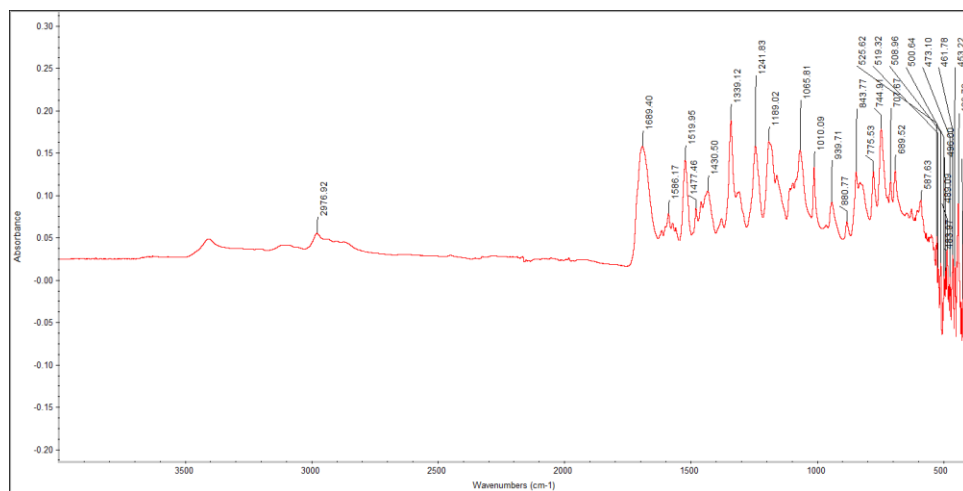

Figure S27. IR spectra of compound 5e.

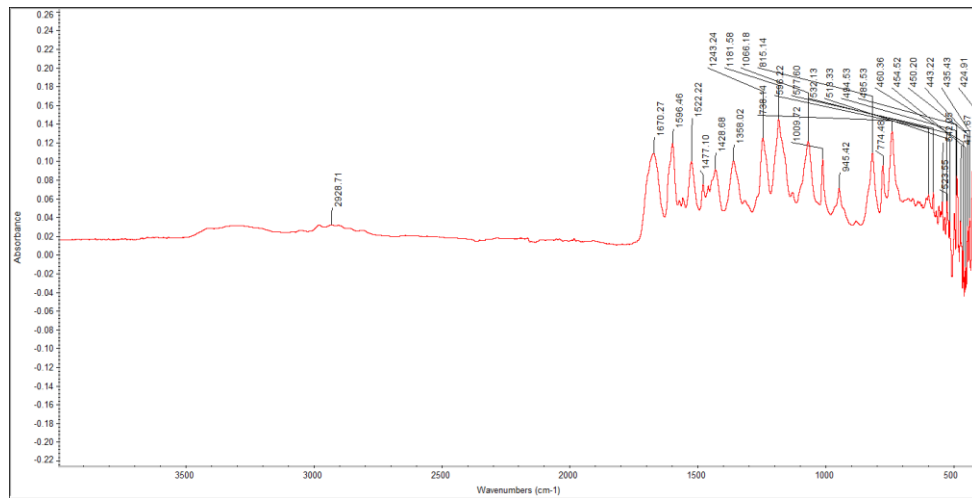

Figure S28. IR spectra of compound 5f.



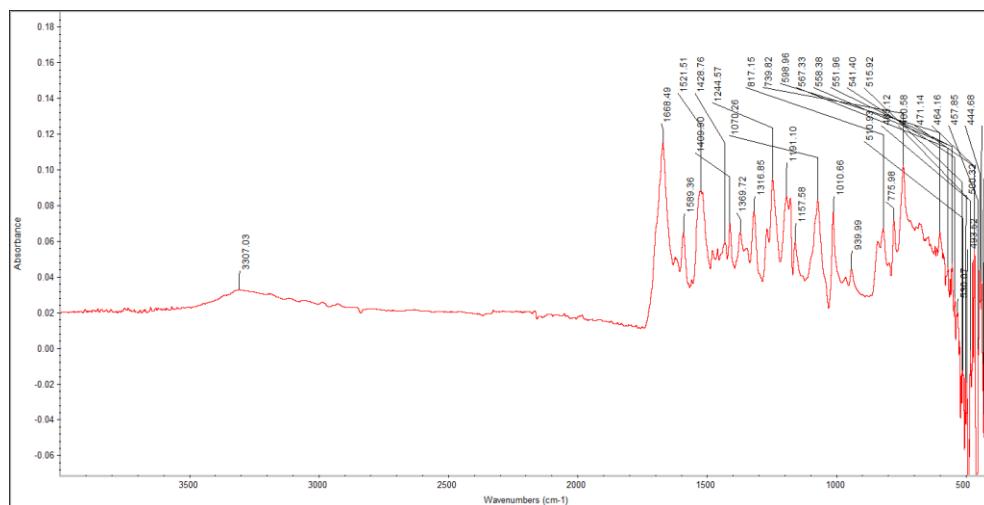

Figure S29. IR spectra of compound 5g.

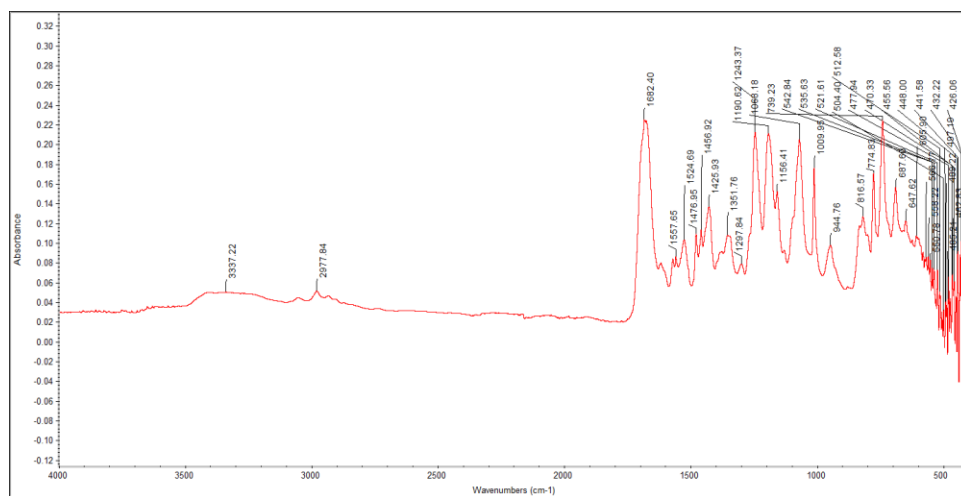

Figure S30. IR spectra of compound 5h.

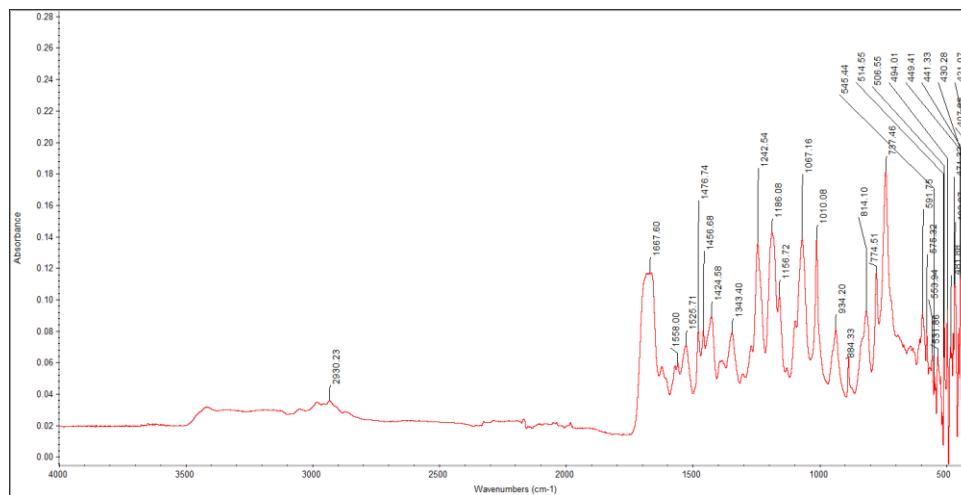

Figure S31. IR spectra of compound 5i.

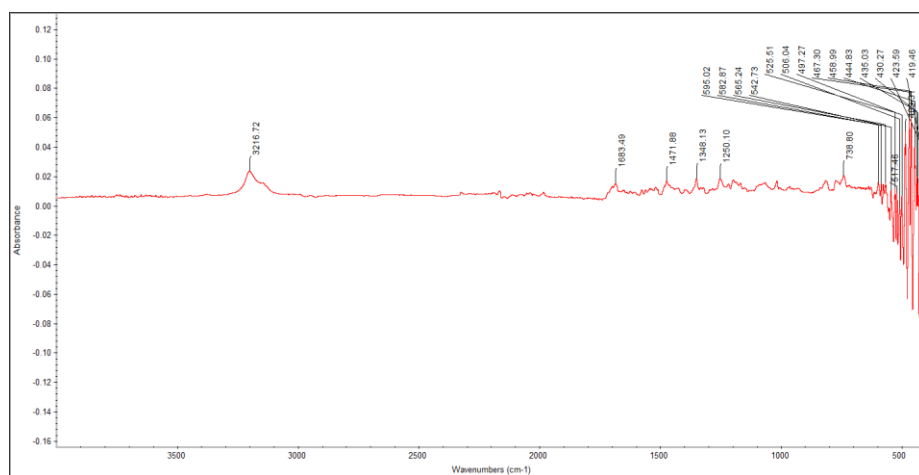

Figure S32. IR spectra of compound 5j.

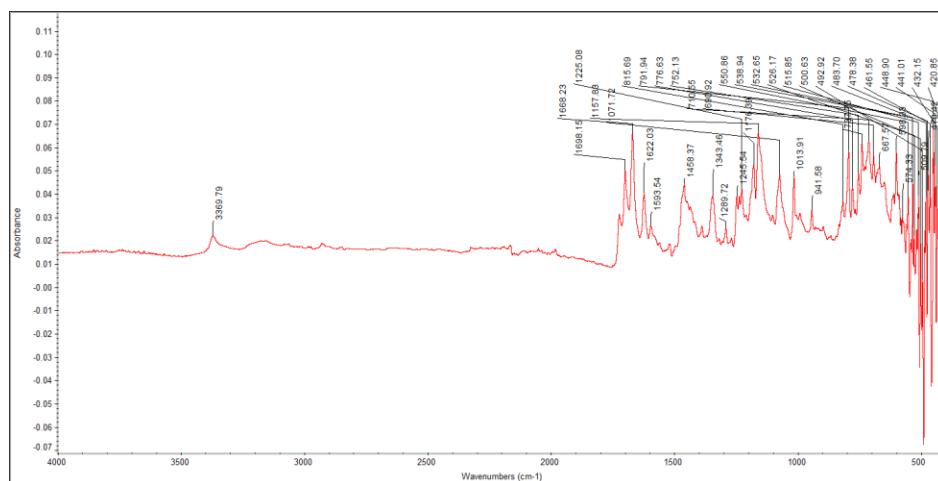

Figure S33. IR spectra of compound 5k.

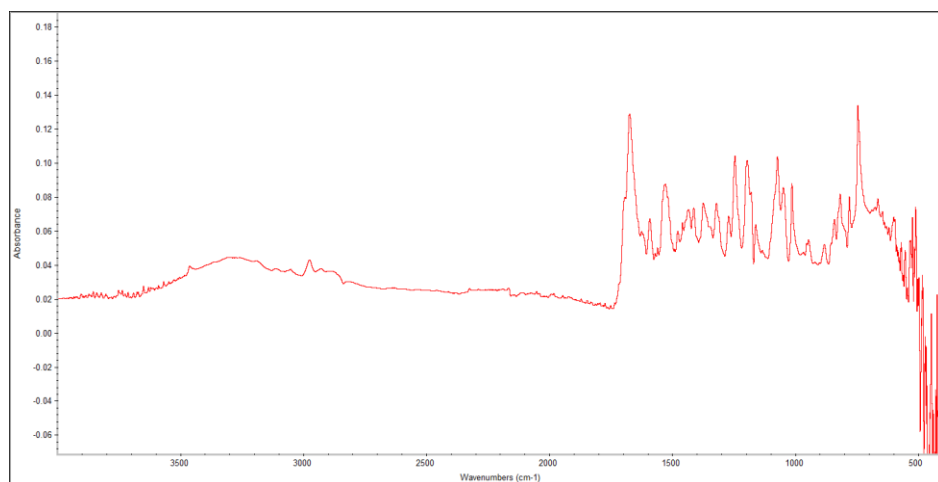

Figure S34. IR spectra of compound 5l.

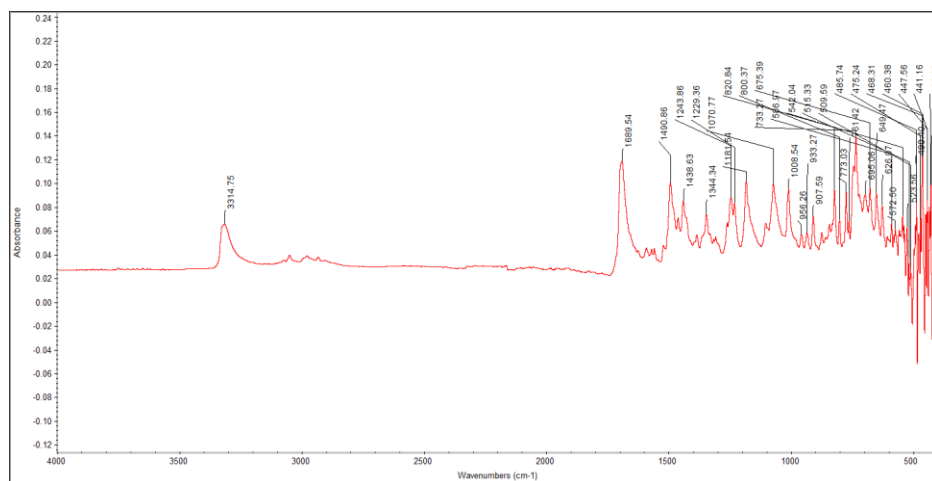

Figure S35. IR spectra of compound 5m.

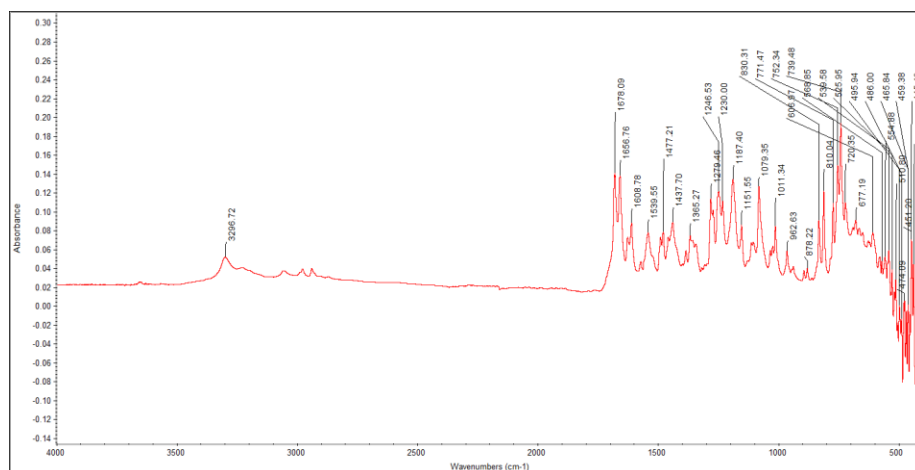

Figure S36. IR spectra of compound 5n.

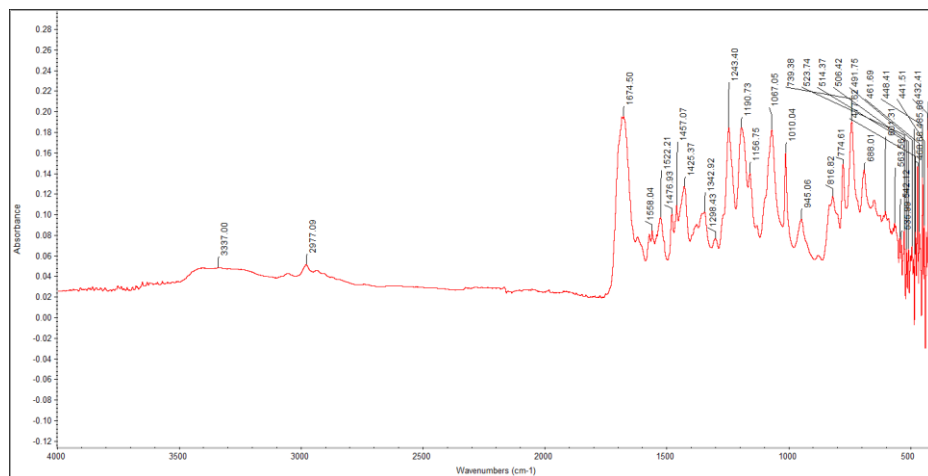

Figure S37. IR spectra of compound 5o.

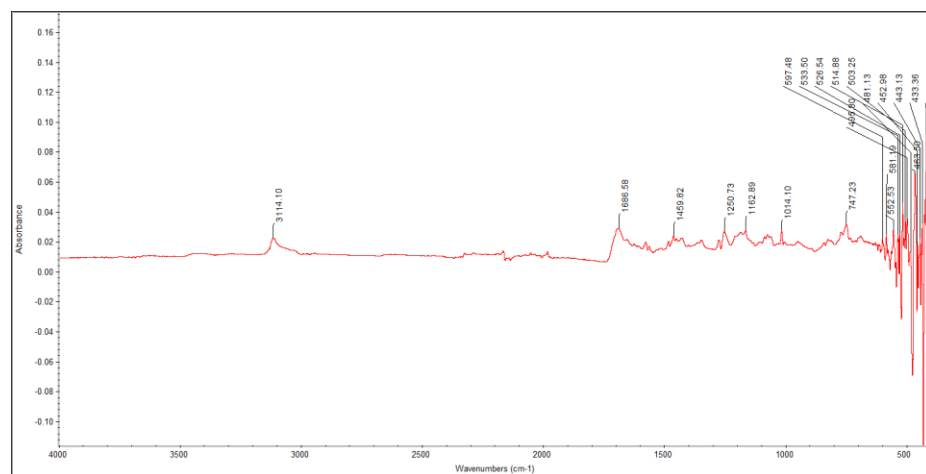

Figure S38. IR spectra of compound 5p.

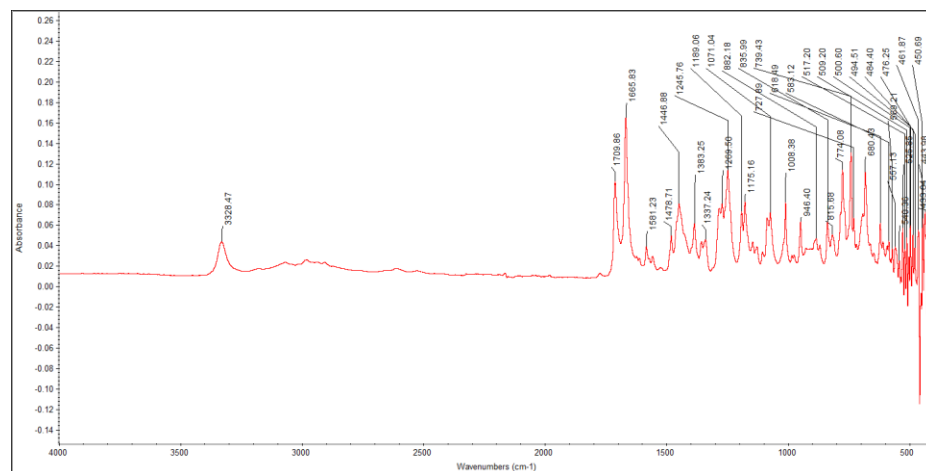

Figure S39. IR spectra of compound 5q.

## 4. MAS-spectra

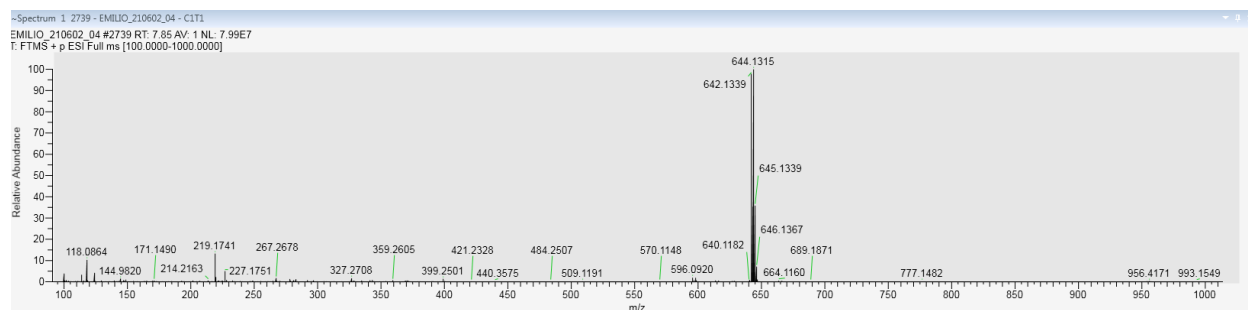

Figure S40. MAS spectra of compound 5e.

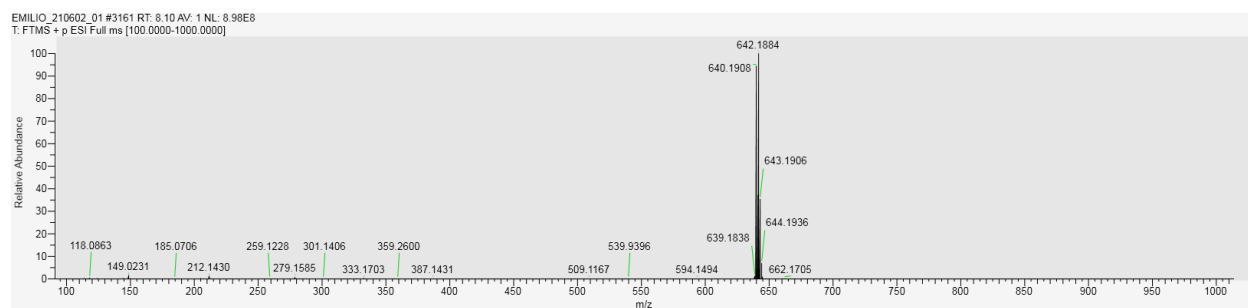

Figure S41. MAS spectra of compound 5f.

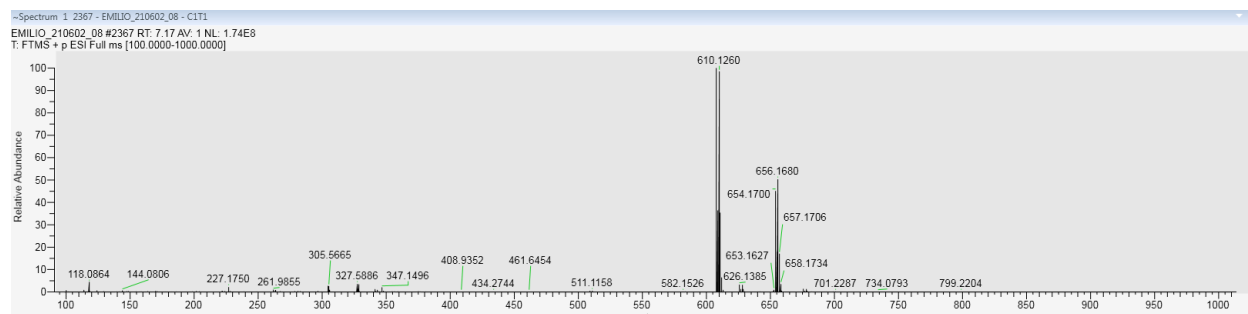

Figure S42. MAS spectra of compound 5g.

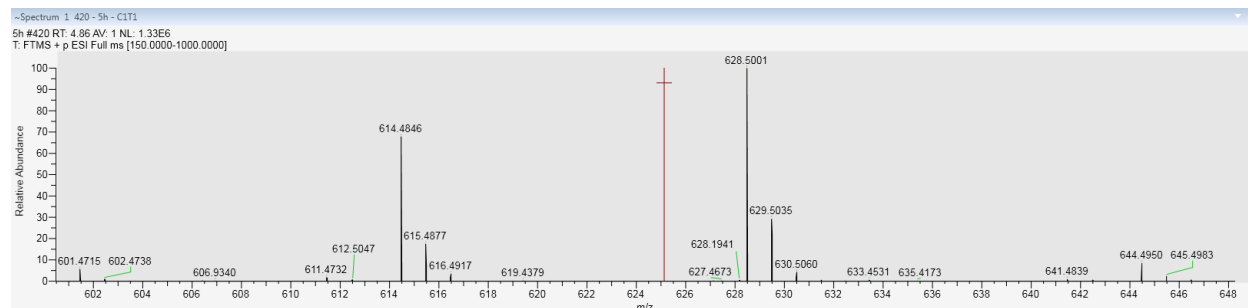

Figure S43. MAS spectra of compound 5h.

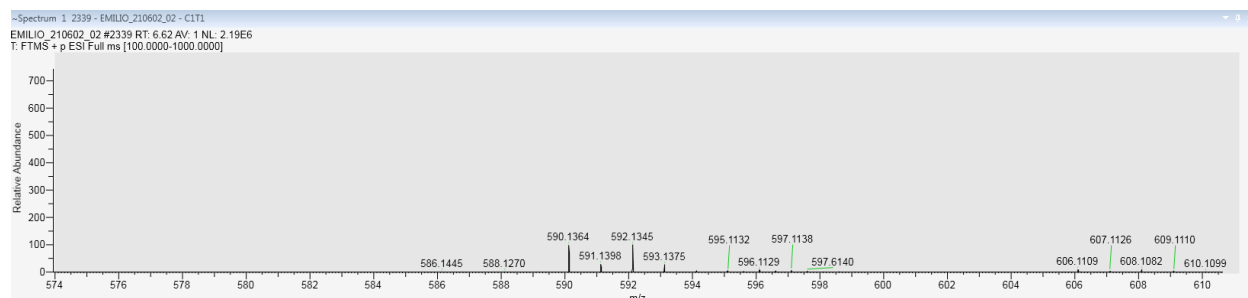

Figure S44. MAS spectra of compound 5i.

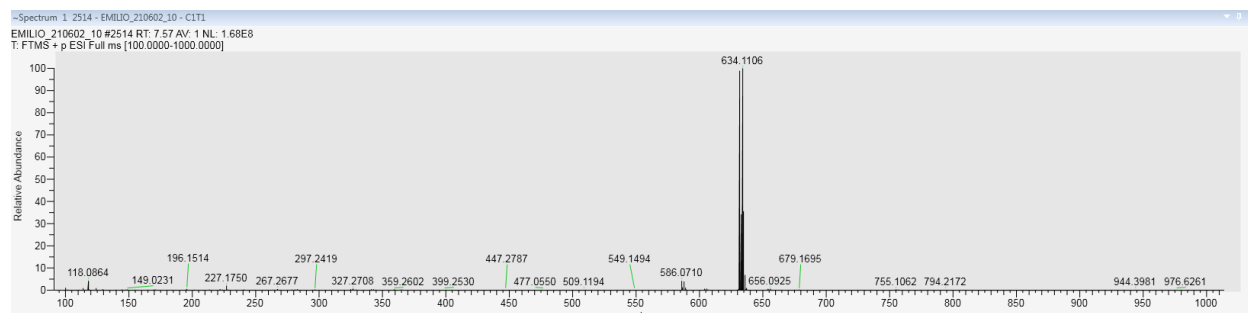

Figure S45. MAS spectra of compound 5j.

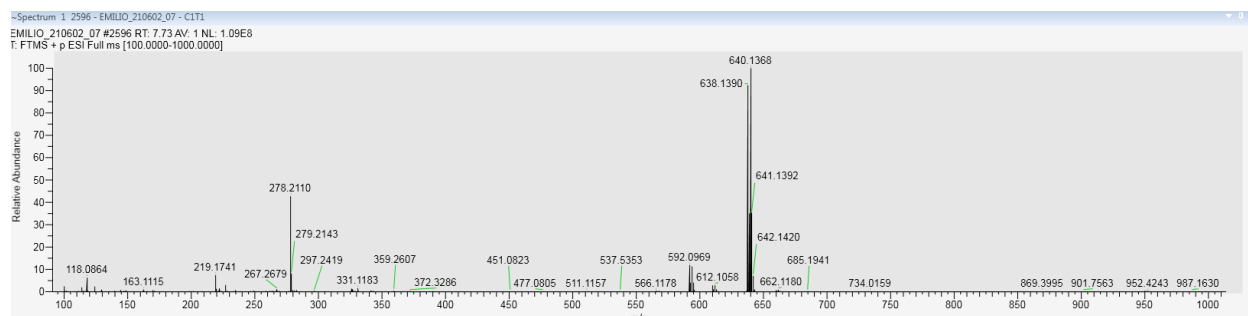

Figure S46. MAS spectra of compound 5k.

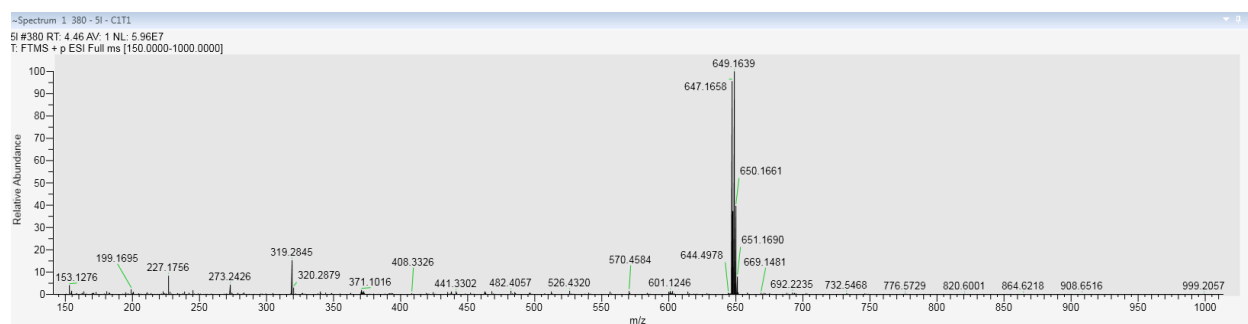

Figure S47. MAS spectra of compound 5l.

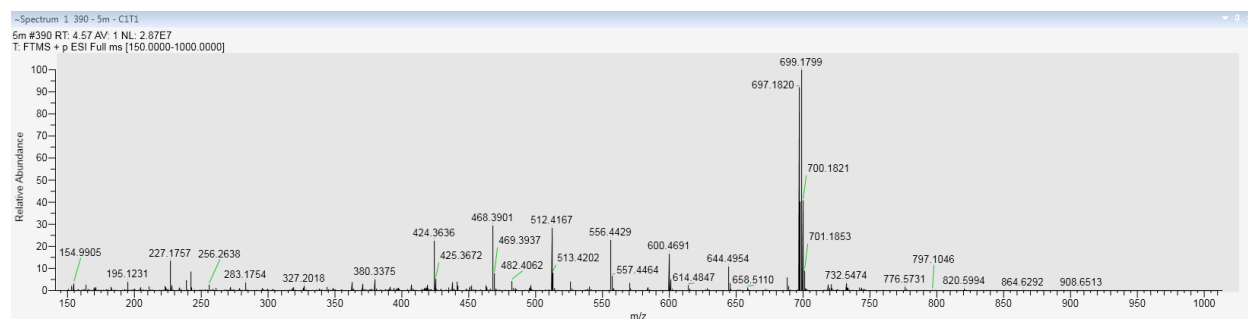

Figure S48. MAS spectra of compound 5m.

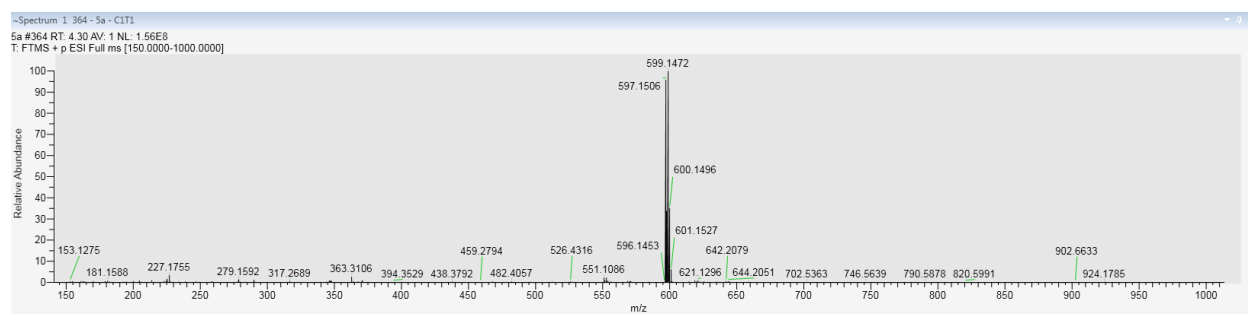

Figure S49. MAS spectra of compound 5n.

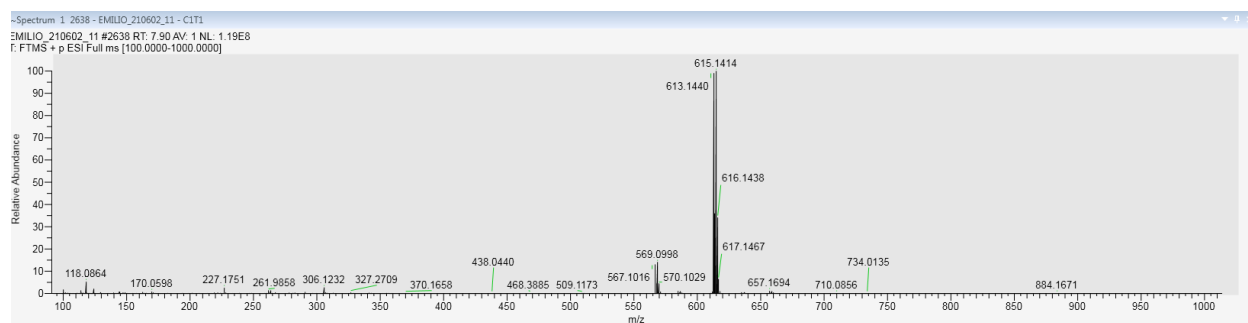

Figure S50. MAS spectra of compound 5o.

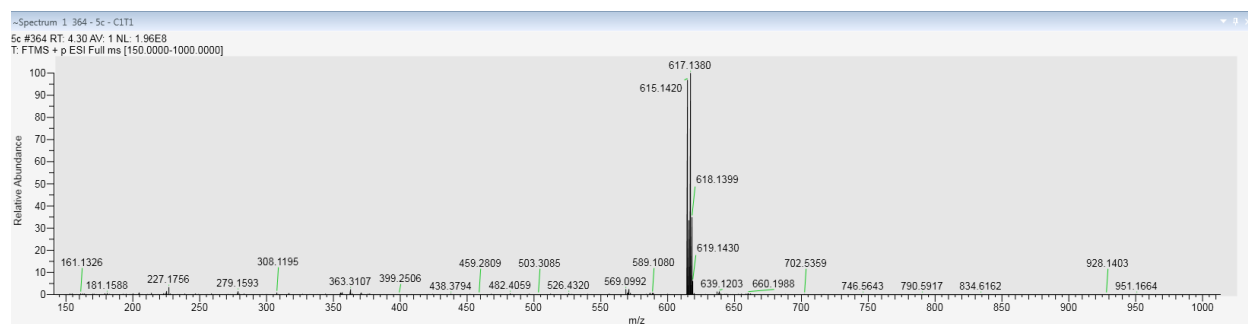

Figure S51. MAS spectra of compound 5p.

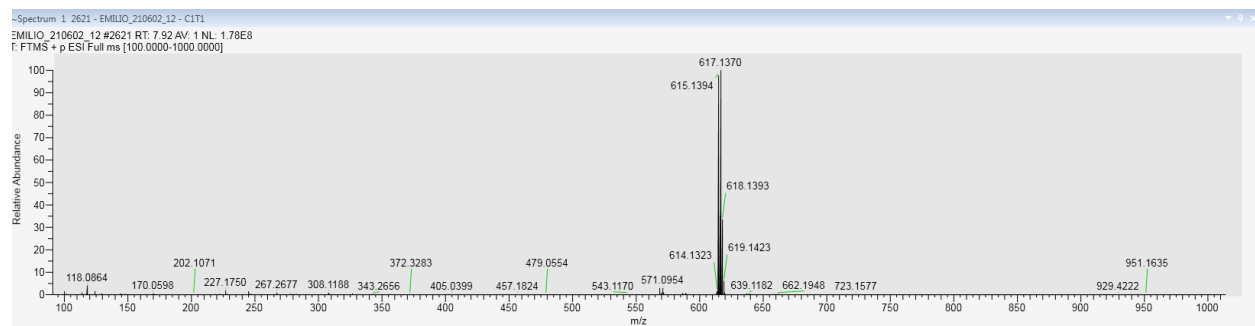

Figure S52. MAS spectra of compound 5q.
